# Supplementary material for: Climate change challenge, extinction risk, and successful conservation experiences for a threatened primate species in China: Golden snub-nosed monkey ( Rhinopithecus roxellana)
Source: PubMed Central journal article supplement — Zool Res. 2022 Nov 18;43(6):940–4. doi: 10.24272/j.issn.2095-8137.2022.198 (PMC9700498; doi:10.24272/j.issn.2095-8137.2022.198), 2022-11-18
Supplement: zr-43-940-S1.pdf [file zr-43-940-S1.pdf]

## Supplementary Materials for

DOI: 10.24272/j.issn.2095-8137.2022.198

### **Climate change challenge, extinction risk, and successful conservation experiences for a threatened primate species in China: Golden snub-nosed monkey (*Rhinopithecus roxellana*)**

Yang Yu<sup>1,2,#</sup>, Gang He<sup>3,#</sup>, Da-Yong Li<sup>4,#</sup>, Xu-Mao Zhao<sup>5</sup>, Jiang Chang<sup>6</sup>, Xue-Cong Liu<sup>7</sup>, Zuo-Fu Xiang<sup>1,\*</sup>, Bao-Guo Li<sup>3,8,\*</sup>, Ming Li<sup>2,8,\*</sup>

<sup>1</sup> College of Life Sciences and Technology, Central South University of Forestry and Technology, Changsha, Hunan 410004, China

<sup>2</sup> CAS Key Laboratory of Animal Ecology and Conservation Biology, Institute of Zoology, Beijing 100101, China

<sup>3</sup> Shaanxi Key Laboratory for Animal Conservation, College of Life Sciences, Northwest University, Xi'an, Shaanxi 710069, China

<sup>4</sup> Key Laboratory of Southwest China Wildlife Resources Conservation (Ministry of Education) China West Normal University, Nanchong, Sichuan 637009, China

<sup>5</sup> State Key Laboratory of Grassland Agro-Ecosystems, Institute of Innovation Ecology, Lanzhou University, Lanzhou, Gansu 730000, China

<sup>6</sup> State Key Laboratory of Environmental Criteria and Risk Assessment, Chinese Research Academy of Environmental Sciences, Beijing 100012, China

<sup>7</sup> College of Life Sciences, University of Chinese Academy of Sciences, Beijing, China

<sup>8</sup> Center for Excellence in Animal Evolution and Genetics, Chinese Academy of Sciences, Kunming, Yunnan 650223, China

#Authors contributed equally to this work

\*Corresponding authors, E-mail: xiangzf@csuft.edu.cn; baoguoli@nwu.edu.cn; lim@ioz.ac.cn

**Supplementary Text**  
**Habitat suitability model**

A total of 188 GPS coordinates of golden snub-nosed monkeys were collected. To reduce spatial bias, we randomly selected one record per 1×1 km cell to filter occurrence locations. Thus, 179 records were used in the habitat suitability model.

Nineteen bioclimatic characteristics from the WorldClim database (<https://www.worldclim.org/>) were used to identify prospective suitable habitat for the species under present climatic conditions (average from 1950 to 2000) and future climatic conditions (2061 to 2080) to capture possible changes in available habitat. The future climate data predictions used were comprised of IPCC-CMIP6 climate projections from three general circulation models (GCMs): i.e., BCC-CSM1-1, CNRM-CM6-1, and CNRM-ESM2-1. For each GCM, we used four shared socioeconomic pathway (SSP) scenarios (i.e., 126, 245, 370, and 585) to represent the most optimistic and most pessimistic emission scenarios, driven by different socioeconomic assumptions. Models were also constructed using other environmental factors, such as elevation, human population density, forest density, distance to the nearest human settlement, distance to the nearest main river (defined as a stream above Class III in China), and distance to the nearest main road (defined as a road above the county level). Rivers, roads, and villages were derived from a 1:1 000 000 map of China (<http://atgcc.sbsm.gov.cn>), and the forest cover layer was derived from the European Space Agency (ESA) land-cover dataset and converted to a forest density layer using the “Density” module in ArcGIS v10.7. We did not analyze changes in non-climatic variables during the 2070s as they were not available for that period. We determined correlations among variables and excluded one variable from each significantly correlated ( $|r| > 0.8$ ) pair to eliminate strong collinearity (Supplementary Table S6).

We separated the golden snub-nosed monkey occurrence data into a training set (75%) to construct the model and a test set (25%) to evaluate the model. We performed jackknife tests to determine the relevance of environmental variables and used a subsample approach in MaxEnt to validate the habitat suitability model. The area under the receiver operating characteristic curve (AUC) was used to assess MaxEnt model performance. The MaxEnt model generally showed good predictive performance (test AUC:  $0.872 \pm 0.021$ ) (Supplementary Figure S2). Our habitat model produced continuous values between 0 and 1, which were used to estimate the likelihood of golden snub-nosed monkey occurrence. Using the threshold values that optimized training sensitivity and specificity, we converted these values to predictions of presence or absence.

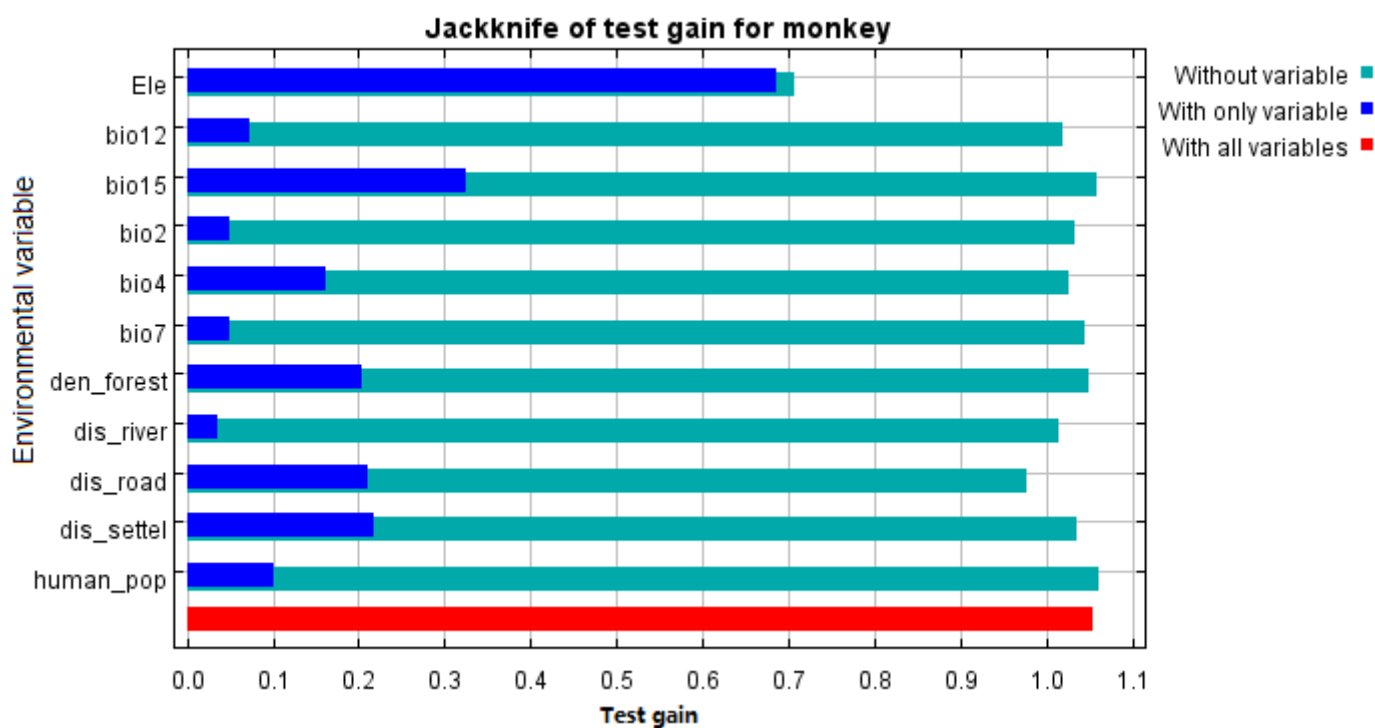

**Supplementary Figure S1 Jackknife test of variable importance in MaxEnt model of golden snub-nosed monkeys**

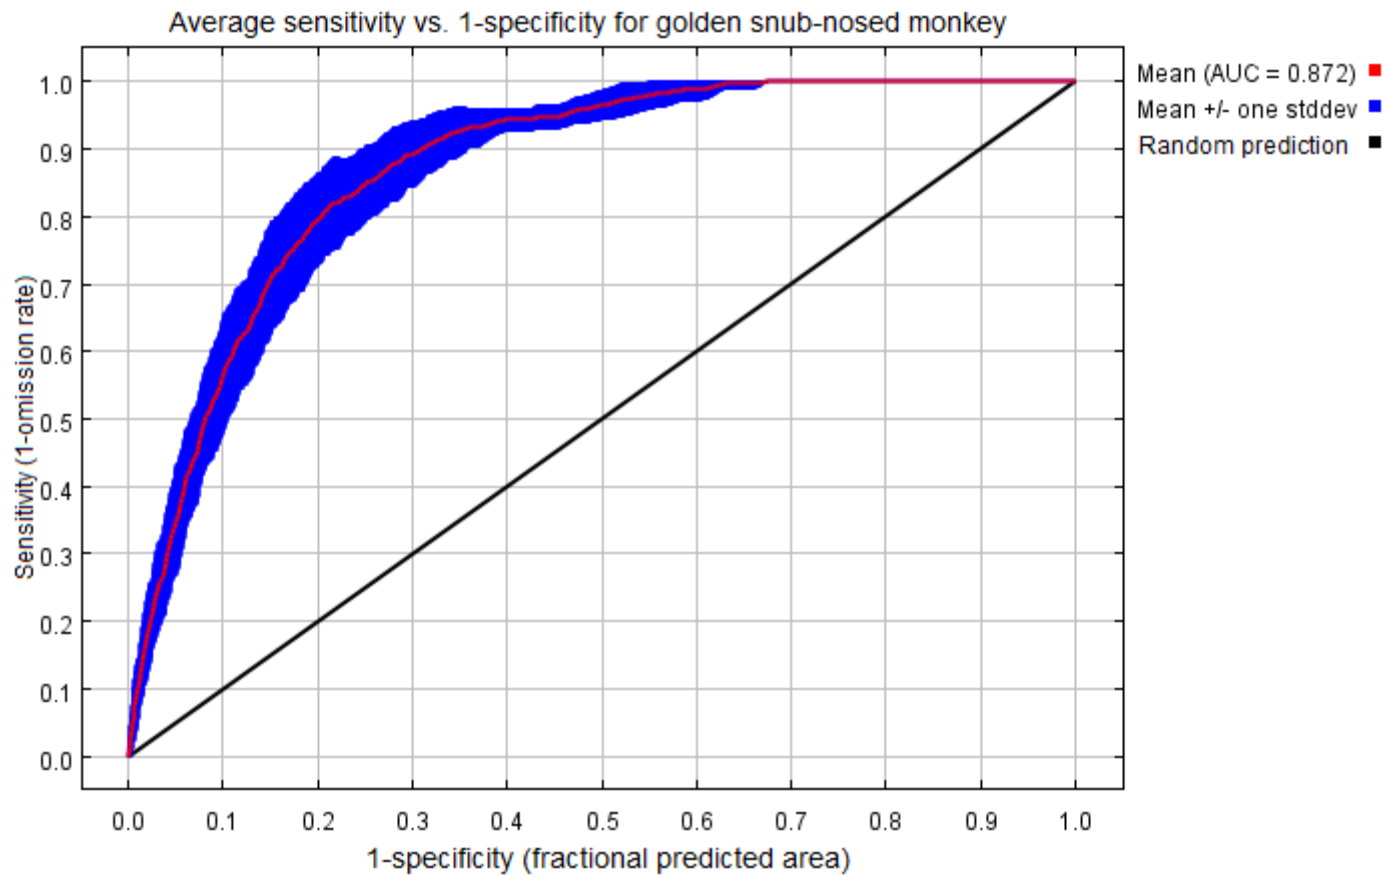

**Supplementary Figure S2 Receiver operating characteristic (ROC) curve (average test AUC for replicate runs is 0.872 and standard deviation is 0.021)**

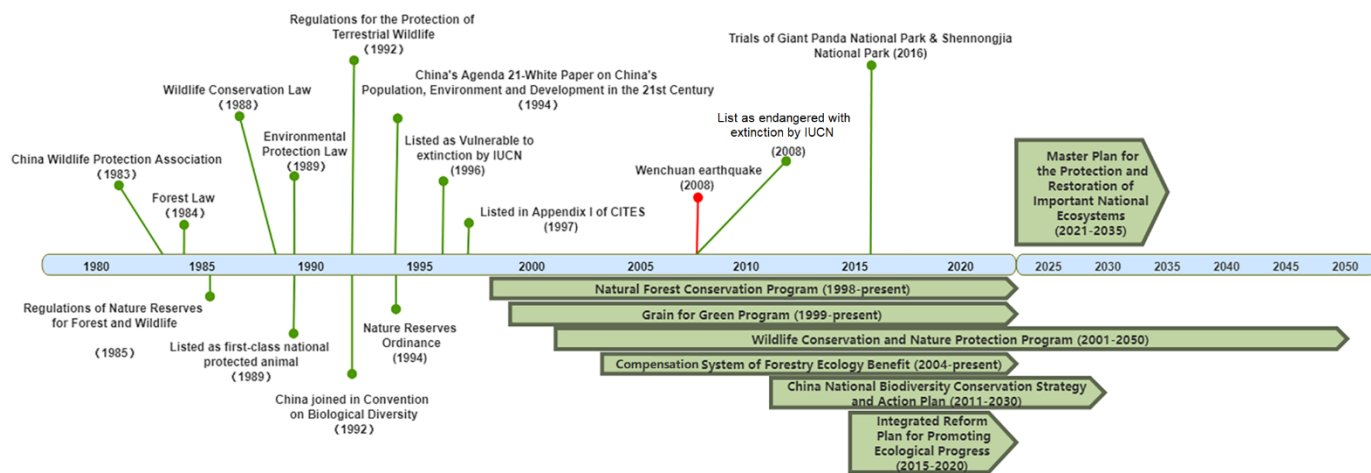

**Supplementary Figure S3 Timeline of key political/socioeconomic/natural events and programs that directly and/or indirectly affect golden snub-nosed monkeys**

**Supplementary Table S1 Population and habitat status of golden snub-nosed monkeys based on current research**

|                                       | <i>roxellana</i> | <i>qinlingensis</i> | <i>hubeiensis</i> | Total           |
|---------------------------------------|------------------|---------------------|-------------------|-----------------|
| <b><i>Population estimates</i></b>    |                  |                     |                   |                 |
| MLS                                   | 114-146 (4-7)    | 62 (6)              | 12                | 188-220 (10-13) |
| Numbers                               | 15880-18190      | 5240-5760           | 1590-2180         | 22710-26130     |
| Proportion inside reserves            | ~95%             | 90%                 | 100%              | ~95%            |
| <b><i>Habitat characteristics</i></b> |                  |                     |                   |                 |
| Reserves (km <sup>2</sup> )           | 16907.41         | 2923.75             | 913.77            | 20744.93        |
| AOO (km <sup>2</sup> )                | 456.00-584.00    | 248.00              | 48.00             | 752.00-880.00   |
| EOO (km <sup>2</sup> )                | 50976.52         | 4254.55             | 124.86            | 55355.93        |

Numbers in brackets represent represent the number of golden snub-nosed monkey MLS that live in areas that are not protected reserves.

**Supplementary Table S2 Estimated size of golden snub-nosed monkey populations in China over time**

| Subspecies/<br>Year | 1998<br>(kirkpatrick) | 2002<br>(Li <i>et al</i> ) | 2008<br>(IUCN) | 2009<br>(SFA) | 2015<br>(IUCN) | 2019<br>(This survey) |
|---------------------|-----------------------|----------------------------|----------------|---------------|----------------|-----------------------|
| <i>roxellana</i>    | /                     | 10800                      | 10970-11000    | 6500          | 10970-11000    | 15880-18190           |
| <i>qinlingensis</i> | /                     | 3800-4000                  | 3800-4000      | 4400          | 4400           | 5240-5760             |
| <i>hubeiensis</i>   | /                     | 600                        | 600-1000       | 1100          | 1100           | 1590-2180             |
| Total               | 15000                 | 1                          |                |               |                | 22710-26130           |

**Supplementary Table S3 List of nature reserves with golden snub-nosed monkeys (data obtained from National Specimen Information Infrastructure; <http://nsii.org.cn/node/822>)**

| Province  | County (district)                   | Name                                   | Classes    | Area (ha) |
|-----------|-------------------------------------|----------------------------------------|------------|-----------|
| Sichuan   | Dujiangyan                          | Longxi-Hongkou National Nature Reserve | National   | 31000     |
|           | Pengzhou                            | Baishuihe National Nature Reserve      | National   | 30150     |
|           | Chongzhou                           | Anzihe National Nature Reserve         | National   | 10141.4   |
|           | Dayi                                | Heishuihe Nature Reserve               | Provincial | 31790     |
|           | Mianzhu/Shifang                     | Jiudingshan Nature reserve             | Provincial | 61640     |
|           | Pingwu                              | Xiaohogou Nature reserve               | Provincial | 28227     |
|           | Pingwu                              | Wanglang National Nature Reserve       | National   | 32297     |
|           | Pingwu                              | Xuebaoding National Nature Reserve     | National   | 63615     |
|           | Pingwu                              | Yujiaoshan Nature Reserve              | County     | 894       |
|           | Pingwu                              | Laohegou Nature Reserve                | County     | 11000     |
|           | Beichuan                            | Xiaozaizigou National Nature Reserve   | National   | 44384.7   |
|           | Beichuan                            | Piankou Nature Reserve                 | Provincial | 19730     |
|           | Beichuan/Anxian                     | Qianfoshan National Nature Reserve     | National   | 11083     |
|           | Qingchuan                           | Maozhai Nature Reserve                 | Provincial | 20800     |
|           | Qingchuan                           | Tangjiahe National Nature Reserve      | National   | 40000     |
|           | Qingchuan                           | Dongyanggou Nature Reserve             | Provincial | 30760     |
|           | Tianquan                            | Labae Nature Reserve                   | Provincial | 23437.3   |
|           | Baoxing                             | Fengyongzhai National Nature Reserve   | National   | 39039     |
|           | Jiuzhaigou                          | Jiuzhaigou National Nature Reserve     | National   | 64297     |
|           | Jiuzhaigou                          | Baihe National Nature Reserve          | National   | 16204.3   |
|           | Jiuzhaigou                          | Wujiao Nature Reserve                  | Provincial | 37014     |
|           | Wenchuan                            | Wolong National Nature Reserve         | National   | 200000    |
|           | Wenchuan                            | Caopo Nature Reserve                   | Provincial | 55612.1   |
|           | Heishui                             | Sandagu Nature Reserve                 | Provincial | 62319.3   |
|           | Songpan                             | Baiyang Nature Reserve                 | Provincial | 76710     |
|           | Songpan                             | Huanglong National Nature Reserve      | National   | 55050.5   |
|           | Songpan                             | Longdishui Nature Reserve              | County     | 25854.6   |
|           | Maoxian                             | Baodinggou Nature Reserve              | Provincial | 89883.6   |
|           | Xiaojinxian                         | Siguniangshan National Nature Reserve  | National   | 56000     |
|           | Lixian                              | Miyalu Nature Reserve                  | Provincial | 160731.7  |
| Kangding  | Jintangkongyu Nature Reserve        | Provincial                             | 26908.6    |           |
| Shanxi    | Zhouzhi                             | Zhouzhi National Nature Reserve        | National   | 56393     |
|           | Zhouzhi                             | Laoxiancheng National Nature Reserve   | National   | 12611     |
|           | Zhouzhi/Taibai/Meixian              | Taibaishan National Nature Reserve     | National   | 56325     |
|           | Zhouzhi/Taibai/Meixian              | Huangbaiyuan National Nature Reserve   | National   | 21865     |
|           | Taibai                              | Niuweihe Nature Reserve                | Provincial | 13492     |
|           | Yangxian                            | Changqing National Nature Reserve      | National   | 29906     |
|           | Foping                              | Foping National Nature Reserve         | National   | 29240     |
|           | Foping                              | Guanyinshan National Nature Reserve    | National   | 13534     |
|           | Ningshan                            | Pingheliang National Nature Reserve    | National   | 21152     |
|           | Ningshan                            | Tianhuashan National Nature Reserve    | National   | 25485     |
| Ningshan  | Huangguanshan Nature Reserve        | Provincial                             | 12372      |           |
| Ningqiang | Qingmuchuan National Nature Reserve | National                               | 10200      |           |
| Gansu     | Wenxian/Wudu                        | Baishuijiang National Nature Reserve   | National   | 183799    |
|           | Wudu                                | Yuhe National Nature Reserve           | National   | 51058     |
| Hubei     | Shennongjia                         | Shennongjia National Nature Reserve    | National   | 70467     |
|           | Badong                              | Badong National Nature Reserve         | National   | 20909.99  |

**Supplementary Table S4 Descriptions of variables used for species distribution modeling**

| Variable | Description                                                |
|----------|------------------------------------------------------------|
| Bio1     | Annual Mean Temperature                                    |
| Bio2     | Mean Diurnal Range (Mean of monthly (max temp - min temp)) |
| Bio3     | Isothermality (BIO2/BIO7) (* 100)                          |
| Bio4     | Temperature Seasonality (standard deviation*100)           |
| Bio5     | Max Temperature of Warmest Month                           |
| Bio6     | Min Temperature of Coldest Month                           |
| Bio7     | Temperature Annual Range (BIO5-BIO6)                       |
| Bio8     | Mean Temperature of Wettest Quarter                        |
| Bio9     | Mean Temperature of Driest Quarter                         |
| Bio10    | Mean Temperature of Warmest Quarter                        |
| Bio11    | Mean Temperature of Coldest Quarter                        |
| Bio12    | Annual Precipitation                                       |
| Bio13    | Precipitation of Wettest Month                             |
| Bio14    | Precipitation of Driest Month                              |
| Bio15    | Precipitation Seasonality (Coefficient of Variation)       |
| Bio16    | Precipitation of Wettest Quarter                           |
| Bio17    | Precipitation of Driest Quarter                            |
| Bio18    | Precipitation of Warmest Quarter                           |

|            |                                                             |
|------------|-------------------------------------------------------------|
| Bio19      | Precipitation of Coldest Quarter                            |
| Ele        | Elevation                                                   |
| Dis_road   | Distance to the main road                                   |
| Dis_river  | Distance to the main river                                  |
| Dis_settle | Distance to the human settlements                           |
| Human_pop  | Proportion of human population within 1 km around the point |
| Den_forest | Proportion of forest within 1 km around the point           |

**Supplementary Table S5 Analysis of relative contributions of environmental variables in MaxEnt model**

| Variable   | Description                                                 | Percent contribution | Permutation importance |
|------------|-------------------------------------------------------------|----------------------|------------------------|
| Ele        | Elevation                                                   | 41.9                 | 56.1                   |
| Dis_road   | Distance to the main road                                   | 17.5                 | 12.2                   |
| Den_forest | Proportion of forest within 1 km around the point           | 11.4                 | 1.6                    |
| Bio15      | Precipitation seasonality (Coefficient of Variation)        | 11.3                 | 3.4                    |
| Dis_settle | Distance to the human settlement                            | 6.9                  | 4.1                    |
| Bio12      | Annual Precipitation                                        | 3.6                  | 6.4                    |
| Dis_river  | Distance to the main river                                  | 2.8                  | 3.9                    |
| Bio4       | Temperature Seasonality (standard deviation $\times 100$ )  | 2.3                  | 6.1                    |
| Bio2       | Mean Diurnal Range (Mean of monthly (max temp - min temp))  | 0.9                  | 2.3                    |
| Human_pop  | Proportion of human population within 1 km around the point | 0.8                  | 0.8                    |
| Bio7       | Temperature Annual Range                                    | 0.7                  | 3.1                    |

**Supplementary Table S6 Correlation analysis of environmental variables**

| Variables  | Bio1   | Bio2   | Bio3   | Bio4   | Bio5   | Bio6   | Bio7   | Bio8   | Bio9   | Bio10  | Bio11  | Bio12  | Bio13  | Bio14  | Bio15  | Bio16  | Bio17  | Bio18  | Bio19  | Ele    | Dis_road | Dis_settle | Dis_river | Den_forest | Human_pop |
|------------|--------|--------|--------|--------|--------|--------|--------|--------|--------|--------|--------|--------|--------|--------|--------|--------|--------|--------|--------|--------|----------|------------|-----------|------------|-----------|
| Bio1       | 1.000  |        |        |        |        |        |        |        |        |        |        |        |        |        |        |        |        |        |        |        |          |            |           |            |           |
| Bio2       | -0.456 | 1.000  |        |        |        |        |        |        |        |        |        |        |        |        |        |        |        |        |        |        |          |            |           |            |           |
| Bio3       | -0.364 | 0.894  | 1.000  |        |        |        |        |        |        |        |        |        |        |        |        |        |        |        |        |        |          |            |           |            |           |
| Bio4       | -0.087 | -0.270 | -0.642 | 1.000  |        |        |        |        |        |        |        |        |        |        |        |        |        |        |        |        |          |            |           |            |           |
| Bio5       | 0.987  | -0.394 | -0.351 | -0.013 | 1.000  |        |        |        |        |        |        |        |        |        |        |        |        |        |        |        |          |            |           |            |           |
| Bio6       | 0.980  | -0.505 | -0.337 | -0.207 | 0.954  | 1.000  |        |        |        |        |        |        |        |        |        |        |        |        |        |        |          |            |           |            |           |
| Bio7       | -0.317 | 0.500  | 0.074  | 0.649  | -0.203 | -0.476 | 1.000  |        |        |        |        |        |        |        |        |        |        |        |        |        |          |            |           |            |           |
| Bio8       | 0.986  | -0.488 | -0.436 | 0.028  | 0.987  | 0.958  | -0.248 | 1.000  |        |        |        |        |        |        |        |        |        |        |        |        |          |            |           |            |           |
| Bio9       | 0.988  | -0.424 | -0.282 | -0.211 | 0.970  | 0.991  | -0.406 | 0.965  | 1.000  |        |        |        |        |        |        |        |        |        |        |        |          |            |           |            |           |
| Bio10      | 0.988  | -0.503 | -0.457 | 0.048  | 0.988  | 0.957  | -0.239 | 0.994  | 0.963  | 1.000  |        |        |        |        |        |        |        |        |        |        |          |            |           |            |           |
| Bio11      | 0.990  | -0.424 | -0.281 | -0.213 | 0.971  | 0.992  | -0.407 | 0.966  | 0.999  | 0.964  | 1.000  |        |        |        |        |        |        |        |        |        |          |            |           |            |           |
| Bio12      | 0.381  | -0.354 | -0.264 | -0.064 | 0.364  | 0.414  | -0.290 | 0.398  | 0.385  | 0.372  | 0.386  | 1.000  |        |        |        |        |        |        |        |        |          |            |           |            |           |
| Bio13      | 0.522  | -0.372 | -0.197 | -0.232 | 0.494  | 0.582  | -0.459 | 0.522  | 0.554  | 0.493  | 0.554  | 0.848  | 1.000  |        |        |        |        |        |        |        |          |            |           |            |           |
| Bio14      | 0.333  | -0.306 | -0.273 | 0.047  | 0.332  | 0.343  | -0.155 | 0.358  | 0.318  | 0.338  | 0.319  | 0.914  | 0.620  | 1.000  |        |        |        |        |        |        |          |            |           |            |           |
| Bio15      | 0.028  | 0.134  | 0.324  | -0.471 | 0.000  | 0.104  | -0.336 | -0.011 | 0.104  | -0.032 | 0.103  | -0.213 | 0.286  | -0.502 | 1.000  |        |        |        |        |        |          |            |           |            |           |
| Bio16      | 0.500  | -0.361 | -0.200 | -0.210 | 0.473  | 0.555  | -0.431 | 0.505  | 0.528  | 0.473  | 0.528  | 0.874  | 0.988  | 0.657  | 0.246  | 1.000  |        |        |        |        |          |            |           |            |           |
| Bio17      | 0.319  | -0.312 | -0.297 | 0.081  | 0.318  | 0.322  | -0.125 | 0.345  | 0.299  | 0.327  | 0.300  | 0.921  | 0.609  | 0.991  | -0.532 | 0.647  | 1.000  |        |        |        |          |            |           |            |           |
| Bio18      | 0.406  | -0.264 | -0.087 | -0.292 | 0.377  | 0.470  | -0.434 | 0.403  | 0.445  | 0.367  | 0.445  | 0.880  | 0.971  | 0.666  | 0.265  | 0.983  | 0.656  | 1.000  |        |        |          |            |           |            |           |
| Bio19      | 0.319  | -0.312 | -0.297 | 0.081  | 0.318  | 0.322  | -0.125 | 0.345  | 0.299  | 0.327  | 0.300  | 0.921  | 0.609  | 0.991  | -0.532 | 0.647  | 1.000  | 0.656  | 1.000  |        |          |            |           |            |           |
| Ele        | -0.951 | 0.547  | 0.539  | -0.159 | -0.953 | -0.907 | 0.181  | -0.968 | -0.912 | -0.976 | -0.913 | -0.368 | -0.448 | -0.352 | 0.135  | -0.435 | -0.350 | -0.314 | -0.350 | 1.000  |          |            |           |            |           |
| Dis_road   | -0.525 | 0.221  | 0.189  | 0.060  | -0.521 | -0.506 | 0.131  | -0.511 | -0.520 | -0.518 | -0.208 | -0.134 | -0.200 | -0.098 | 0.002  | -0.188 | -0.107 | -0.133 | -0.107 | 0.498  | 1.000    |            |           |            |           |
| Dis_settle | -0.654 | 0.297  | 0.221  | 0.115  | -0.635 | -0.638 | 0.233  | -0.626 | -0.652 | -0.639 | -0.521 | -0.127 | -0.235 | -0.086 | -0.028 | -0.212 | -0.090 | -0.147 | -0.090 | 0.611  | 0.586    | 1.000      |           |            |           |
| Dis_river  | -0.196 | -0.040 | -0.072 | 0.124  | -0.196 | -0.190 | 0.051  | -0.179 | -0.207 | -0.180 | -0.653 | 0.034  | -0.024 | 0.061  | -0.063 | -0.009 | 0.060  | 0.007  | 0.060  | 0.159  | 0.258    | 0.200      | 1.000     |            |           |
| Den_forest | -0.094 | 0.124  | 0.163  | -0.157 | -0.121 | -0.101 | -0.029 | -0.142 | -0.094 | -0.122 | -0.093 | -0.184 | -0.285 | -0.071 | -0.201 | -0.289 | -0.083 | -0.267 | -0.083 | 0.124  | 0.074    | 0.034      | -0.030    | 1.000      |           |
| Human_pop  | 0.185  | -0.146 | -0.150 | 0.066  | 0.188  | 0.181  | -0.035 | 0.196  | 0.178  | 0.196  | 0.178  | 0.108  | 0.189  | 0.051  | 0.106  | 0.183  | 0.061  | 0.158  | 0.061  | -0.188 | -0.131   | -0.146     | -0.037    | -0.151     | 1.000     |

## REFERENCES

- Kirkpatrick RC. 1998. Ecology and behavior in snub-nosed and douc langurs. *In*: Jablonski NG. The Natural History of the Doucs and Snub-Nosed Monkeys. Singapore: World Scientific Press.
- Li BG, Pan RL, Oxnard CE. 2002. Extinction of snub-nosed monkeys in China during the past 400 years. *International Journal of Primatology*, **23**(6): 1227–1244.
- Long Y, Richardson M. 2015. *Rhinopithecus roxellana*. The IUCN red list of threatened species 2020. e.T19596A17943886. <https://dx.doi.org/10.2305/IUCN.UK.2020-2.RLTS.T19596A17943886.en>
- Long Y, Richardson M. 2021. *Rhinopithecus roxellana*. The IUCN red list of threatened species 2021: e.T19596A196491153. <https://dx.doi.org/10.2305/IUCN.UK.2008.RLTS.T19596A8985735.en>.
- State Forestry Administration of China. 2009. Investigation of Key Terrestrial Wildlife Resources in China. Beijing: China Forestry Publishing House. (in Chinese)
